# Supplementary material for: Once-daily delayed-release metformin lowers plasma glucose and enhances fasting and postprandial GLP-1 and PYY: results from two randomised trials
Source: PubMed Central journal article supplement (PMC4930485; doi:10.1007/s00125-016-3992-6), 2016-05-23

**ESM Table 1.** Standardized Meal Details (Study 1 and Study 2)

|                    | Kilojoules (Kcals) | Carbohydrate | Fat | Protein |
|--------------------|--------------------|--------------|-----|---------|
| Study 1            |                    |              |     |         |
| Breakfast (t=0 h)  | 2,197 (525)        | 58%          | 22% | 20%     |
| Lunch (t=5 h)      | 4,434 (1,060)      | 58%          | 32% | 10%     |
| Study 2            |                    |              |     |         |
| Lunch (t=-6 h)     | 4,434 (1,060)      | 58%          | 32% | 10%     |
| Dinner (t=0 h)     | 3,132 (749)        | 40%          | 44% | 16%     |
| Snack (t=3 h)      | 787 (188)          | 91%          | 9%  | 0%      |
| Breakfast (t=12 h) | 2,151 (514)        | 59%          | 30% | 11%     |
| Lunch (t=18 h)     | 4,434 (1,060)      | 58%          | 32% | 10%     |

ESM Fig. 1

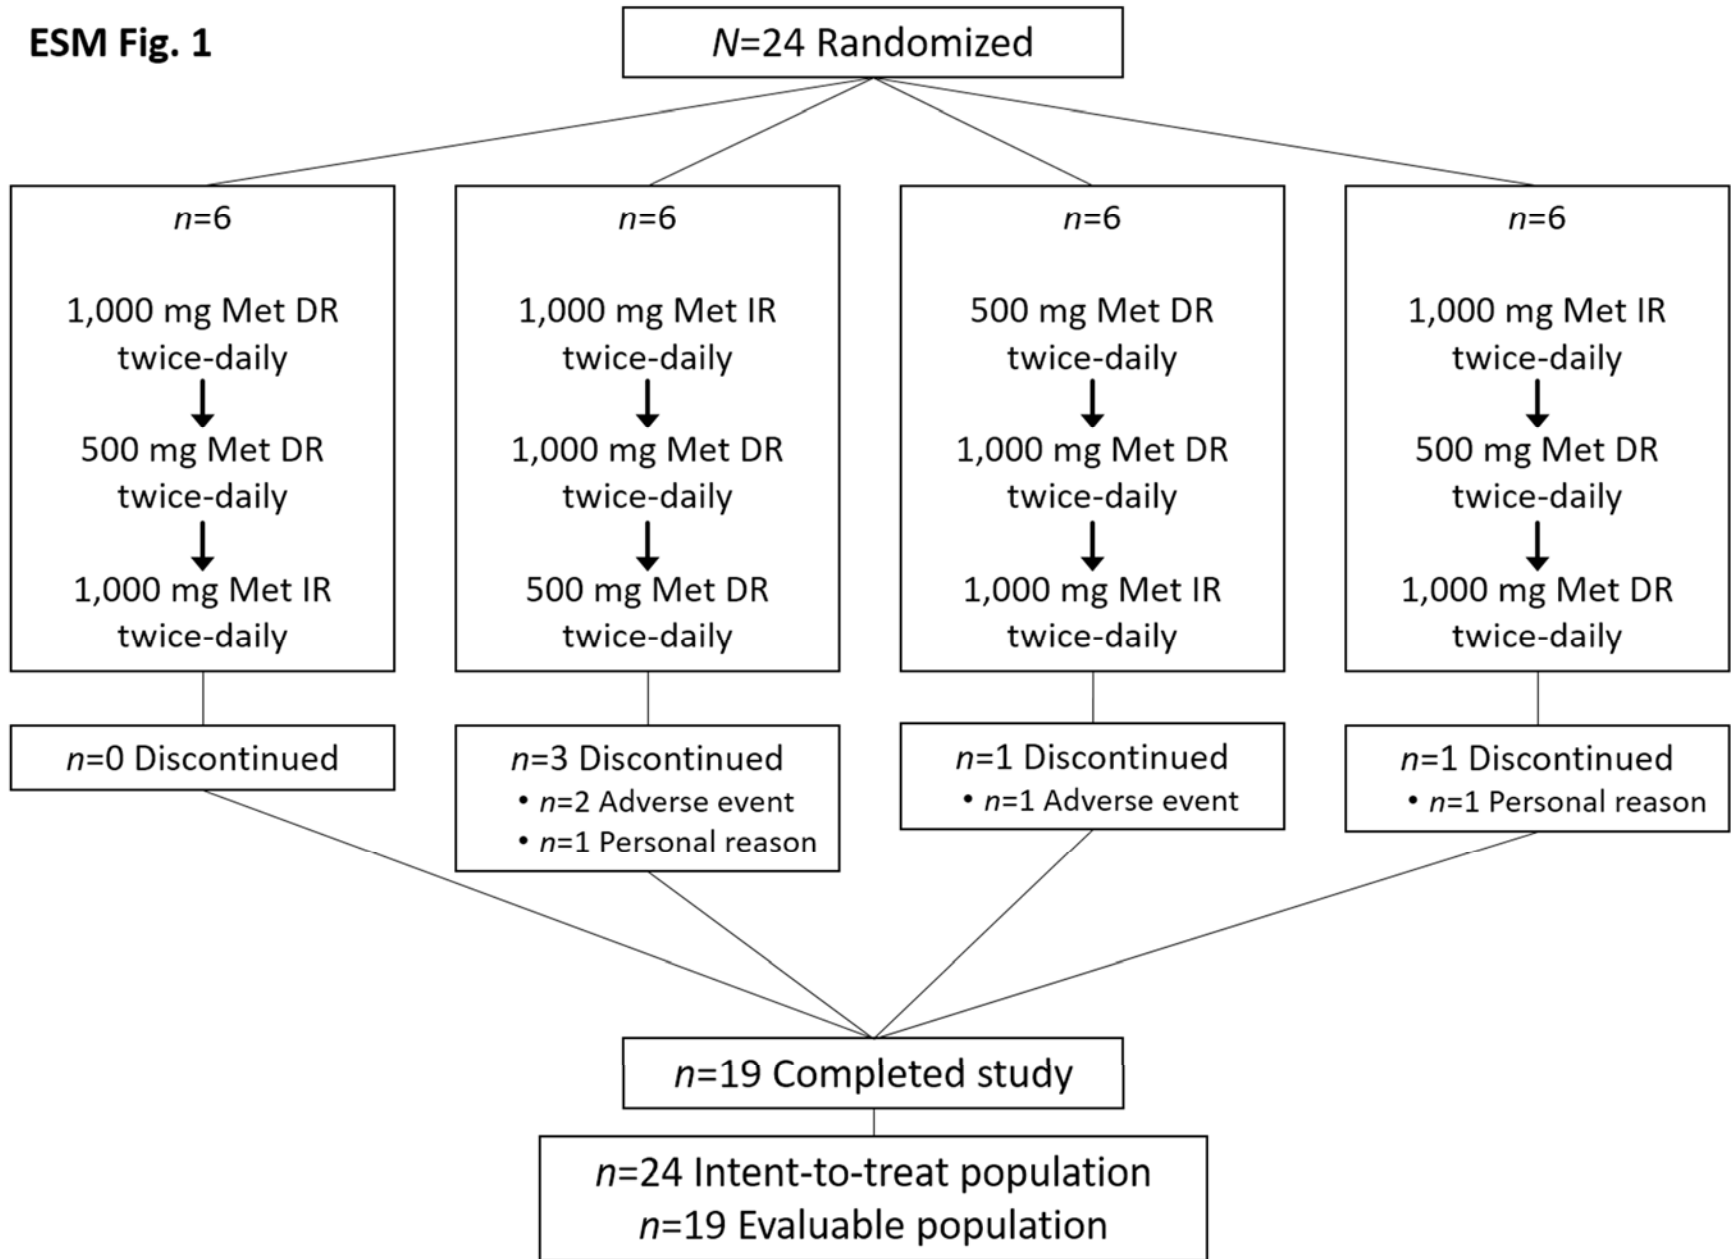

ESM Fig. 2

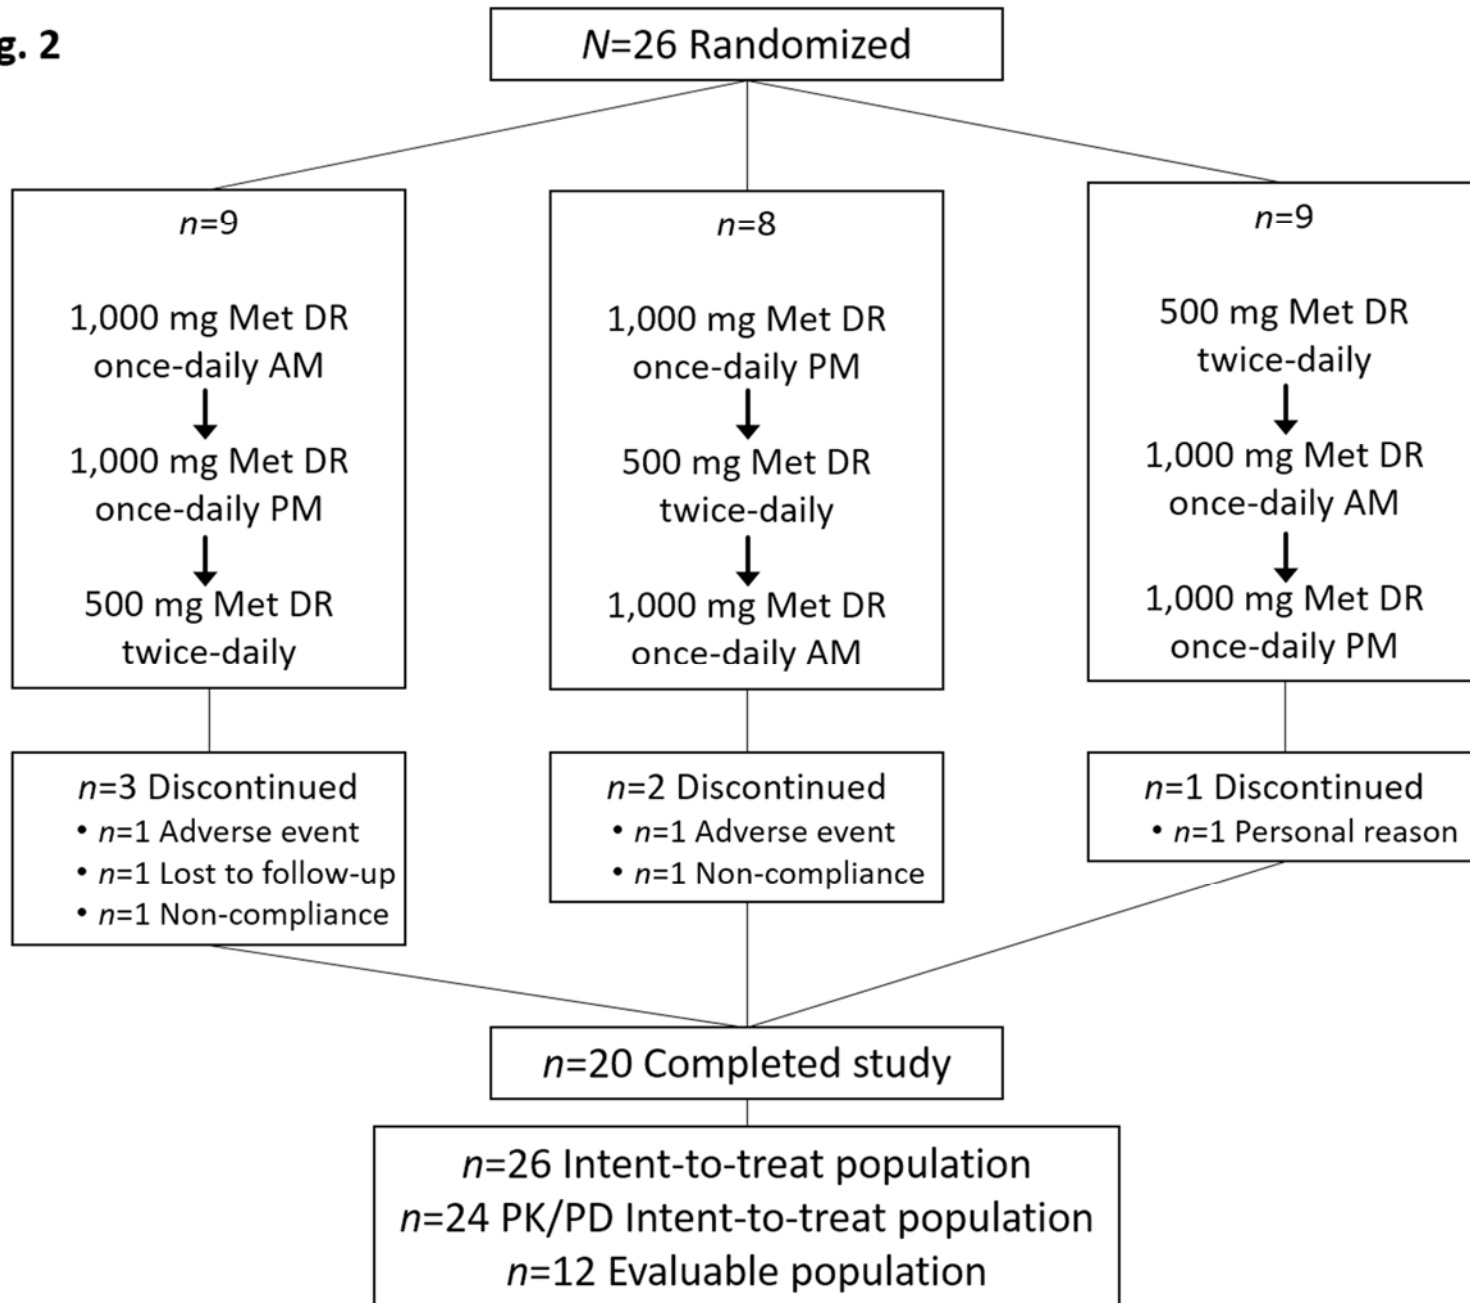

Supplement: 125_2016_3992_MOESM1_ESM.pdf [file 125_2016_3992_MOESM1_ESM.pdf]
